# Supplementary material for: Amino acid-modulating gold nanoparticle sensor array: an express metal ion recognition system
Source: Royal Society of Chemistry journal article supplement (doi:10.1039/c9ay01791g), 2019-01-01
Supplement: c9ay01791g1.pdf [file c9ay01791g1.pdf]

### Supporting Information

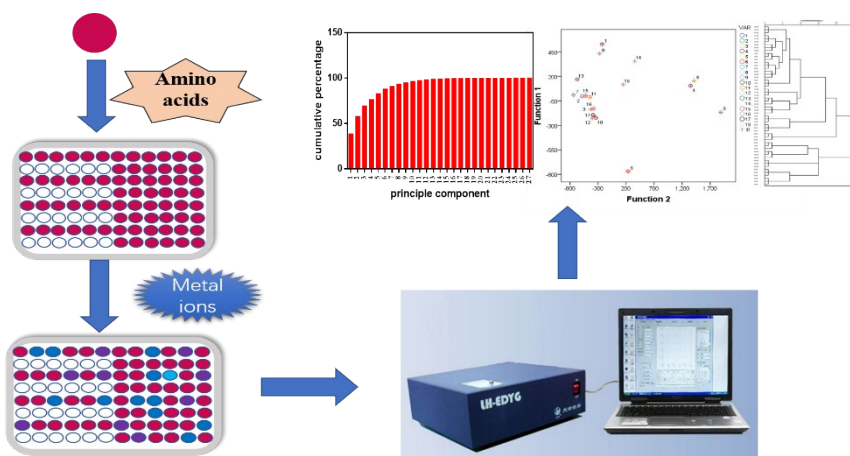

Fig.S1 Flow chart of array detection

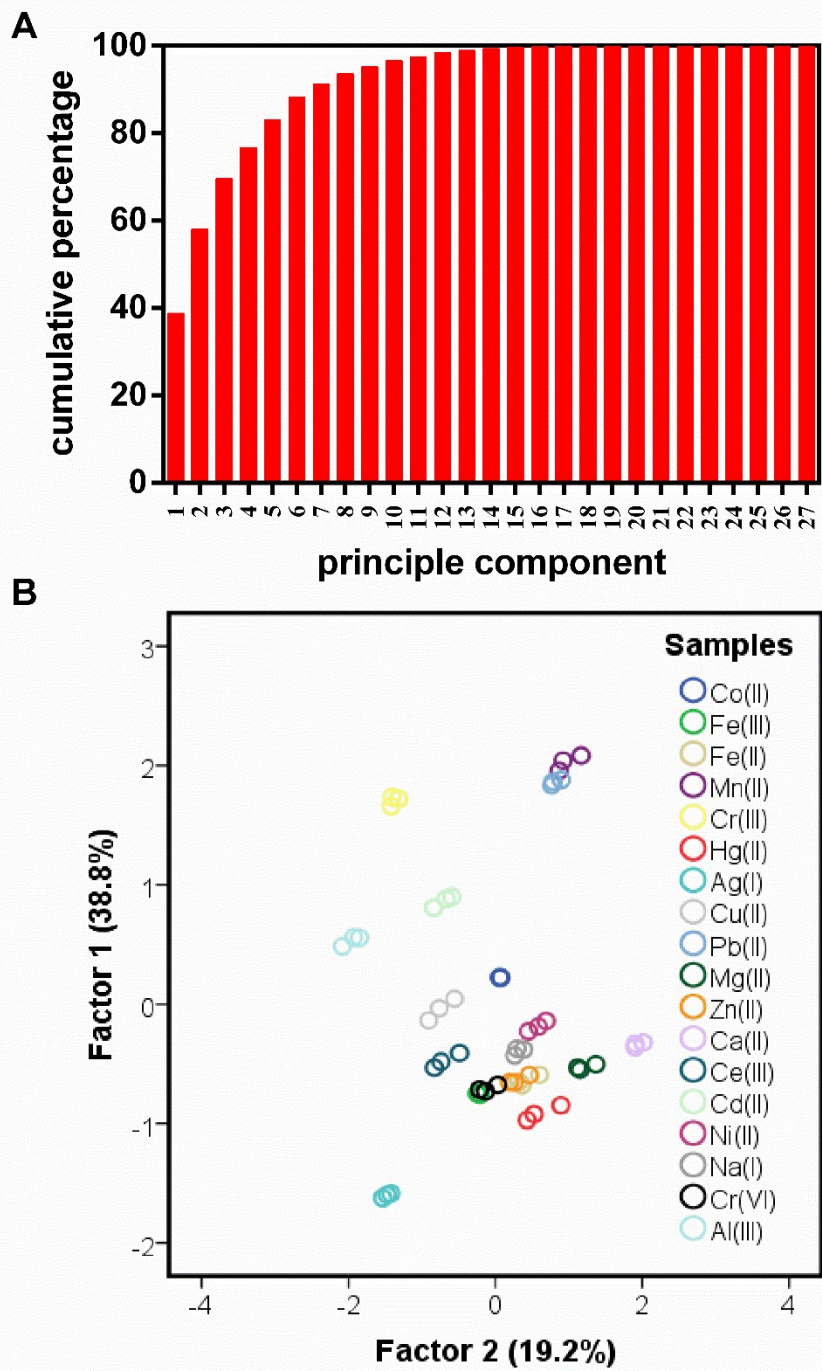

Fig.S2 PCA results: (A) principal component variance accumulation; (B) Scatter plots of the first two principal components
